# Supplementary material for: Effect of EGCG Extracted from Green Tea against Largemouth Bass Virus Infection
Source: MDPI journal article supplement (doi:10.3390/v15010151), 2023-01-03
Supplement: s1 [file s1]

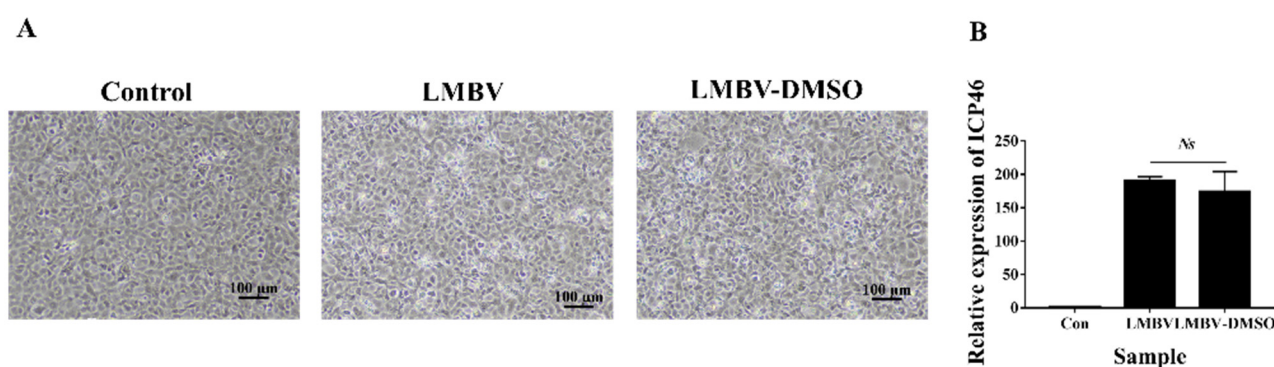

**Supplementary Figure S1.** The effect of DMSO on LMBV infection. FHM cells ( $1.5 \times 10^6$ ) were seeded in 12-well plates and incubated at 28 °C for 18 h. DMSO was diluted 8.33 times, which was same as diluted EGCG. Diluted DMSO was premixed with LMBV (MOI=1) as the test group. FHM cells incubated with LMBV (MOI=1) served as control group. FHM cells incubated with L15 medium alone served as blank group. (A) the CPEs were observed by light microscopy after 48h infection at 28 °C; (B) FHM cells and culture medium in each wells were used to extract total RNA, and the expression of the ICP46 gene was assessed by RT-qPCR at 48hpi. All the results showed that the addition of DMSO did not show an effect on LMBV infected FHM cells.

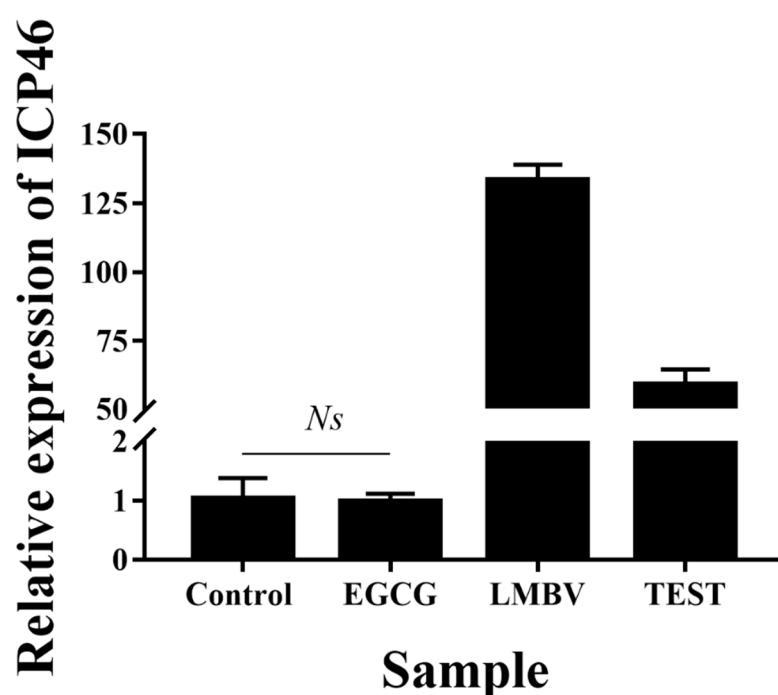

**Supplementary Figure S2.** The effect of EGCG on LMBV infection. Control was FHM cells with serum-free L15 medium. EGCG was FHM cells with EGCG at safe concentrations. LMBV was FHM cells with LMBV (MOI-1). TEST was FHM cells with EGCG at safe concentrations and LMBV (MOI-1).
